# Supplementary material for: HACANCOi: a new Hα-detected experiment for backbone resonance assignment of intrinsically disordered proteins
Source: PubMed Central journal article supplement (PMC7701164; doi:10.1007/s10858-020-00347-5), 2020-10-28
Supplement: 10858_2020_347_MOESM1_ESM.pdf [file 10858_2020_347_MOESM1_ESM.pdf]

# Supplementary material

## **HACANCOi: a new H<sup>α</sup>-detected experiment for backbone resonance assignment of intrinsically disordered proteins**

**Mikael Karjalainen<sup>1</sup>, Helena Tossavainen<sup>2</sup>, Maarit Hellman<sup>2</sup>, Perttu Permi<sup>1,2\*</sup>**

<sup>1</sup>Department of Chemistry, Nanoscience Center, University of Jyväskylä, Jyväskylä, Finland.

<sup>2</sup>Department of Biological and Environmental Science, University of Jyväskylä, Jyväskylä, Finland

\*Corresponding author:

Perttu Permi, [perttu.permi@jyu.fi](mailto:perttu.permi@jyu.fi)

ORCID of the authors:

Mikael Karjalainen, 0000-0003-3154-7570

Helena Tossavainen, 0000-0002-1609-1651

Perttu Permi, 0000-0002-6281-1138

**Fig. S1.**

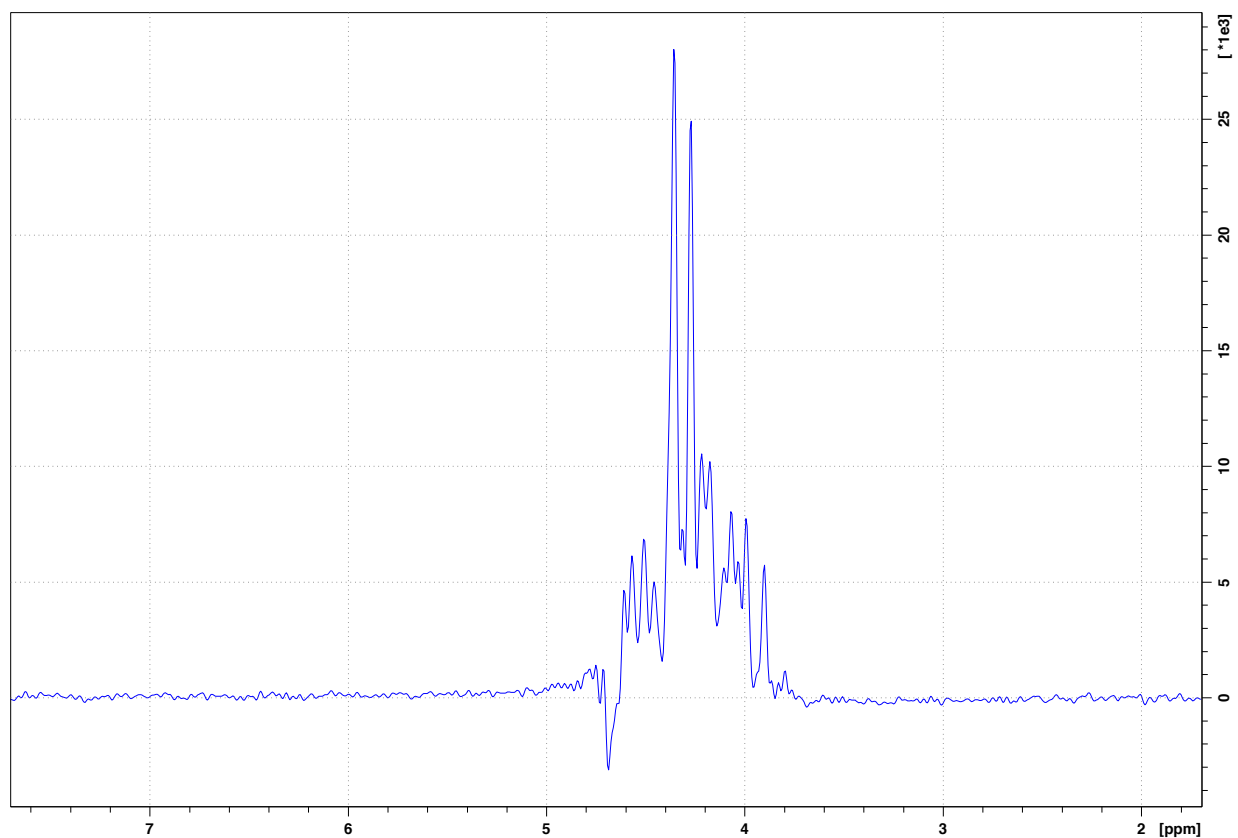

**Fig. S1. The first increment of HA(CA)NCOi on  $^{15}\text{N}$ ,  $^{13}\text{C}$  labeled EspF in complex with unlabeled SNX9-SH3.**

The sample was 1.5 mM  $^{15}\text{N}$ ,  $^{13}\text{C}$  labeled EspF: 2.5 mM unlabeled SNX9-SH3 complex in 95/5%  $\text{H}_2\text{O}/\text{D}_2\text{O}$ . The experiment was executed with 16 scans per FID and recycle delay of 0.85 seconds. No post-acquisition solvent suppression was employed prior to Fourier transform.

Fig. S2.

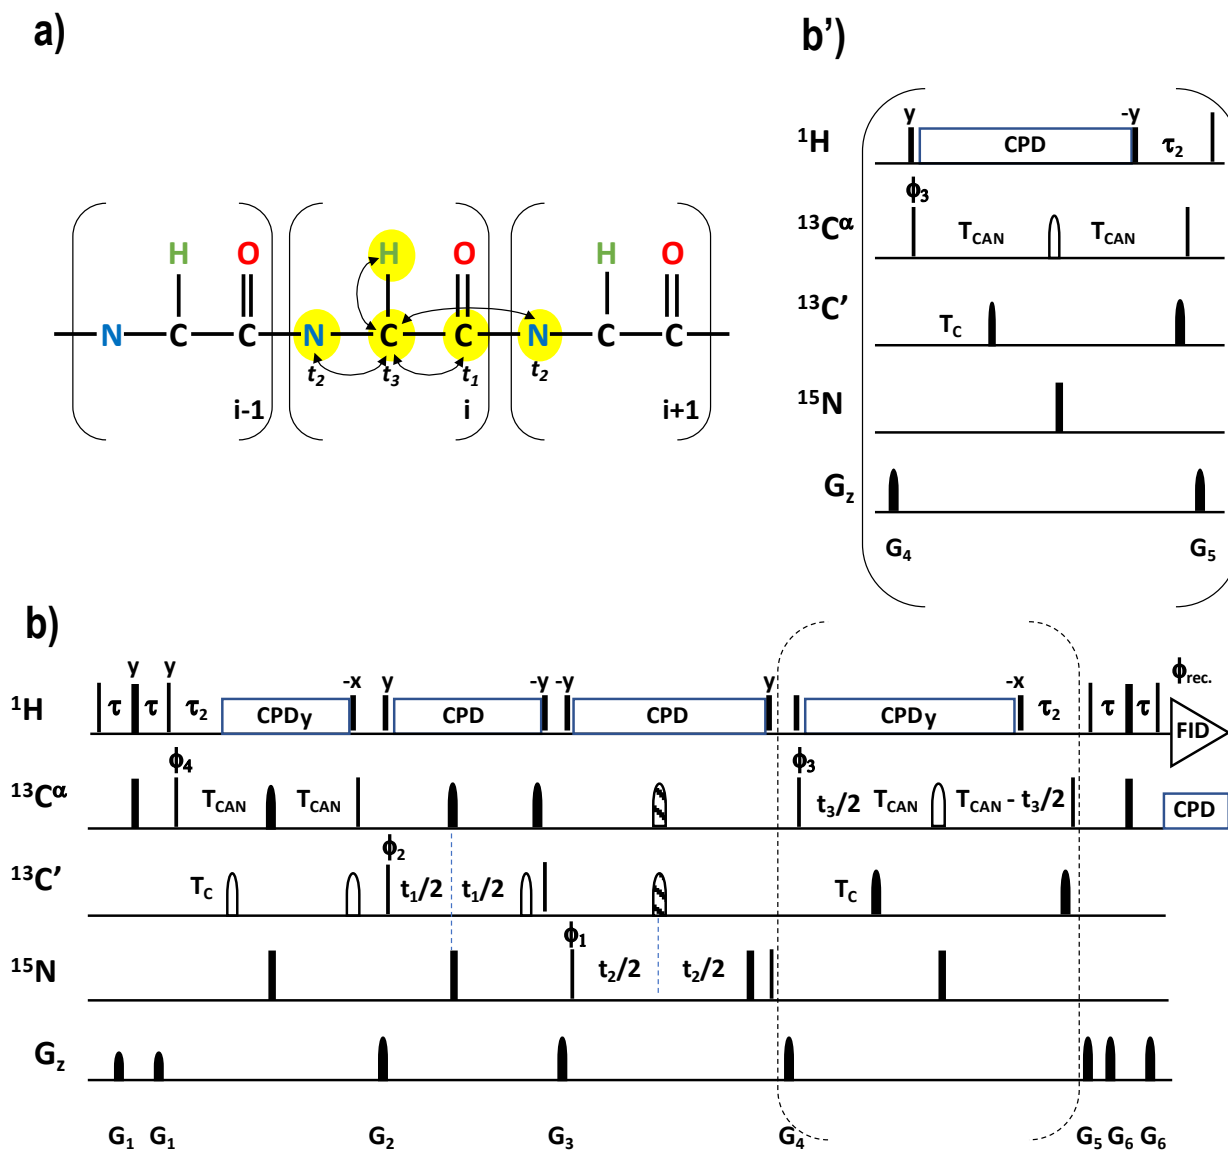

**Fig. S2. Description of the HACANCOi experiment without the Rance-Kay sensitivity enhancement.**

**a)** Schematic presentation of magnetization transfer pathway during the 4D HACANCOi experiment. Black arrows indicate the so-called out-and-back transfer pathway from  $^1\text{H}^\alpha(i)$  to  $^{13}\text{C}^\alpha(i)$  and further to  $^{13}\text{C}'(i)$  and  $^{15}\text{N}(i)/^{15}\text{N}(i+1)$ . **b)** 4D HACANCOi experiment to correlate  $^1\text{H}^\alpha(i)$ ,  $^{13}\text{C}^\alpha(i)$ ,  $^{13}\text{C}'(i)$  and  $^{15}\text{N}(i)/^{15}\text{N}(i+1)$  chemical shifts. Inset **b')** 3D HA(CA)NCOi experiment to correlate  $^1\text{H}^\alpha(i)$ ,  $^{13}\text{C}'(i)$  and  $^{15}\text{N}(i)/^{15}\text{N}(i+1)$  chemical shifts. Narrow and wide filled bars on  $^1\text{H}$  and  $^{15}\text{N}$  channels correspond to rectangular  $90^\circ$  and  $180^\circ$  pulses, respectively, applied with phase  $x$  unless otherwise stated. All  $^{13}\text{C}$  pulses are band-selective shaped pulses, denoted by

filled narrow bars ( $90^\circ$ ) and filled and unfilled half ellipsoids ( $180^\circ$ ). Pulses denoted with unfilled bars are applied on-resonance. The  $^1\text{H}$ ,  $^{15}\text{N}$ ,  $^{13}\text{C}'$ , and  $^{13}\text{C}^\alpha$  carrier positions are 4.7 (water), 121 (center of  $^{15}\text{N}$  spectral region), 174 ppm (center of  $^{13}\text{C}'$  spectral region), and 54 ppm (center of  $^{13}\text{C}^\alpha$  spectral region). The  $^{13}\text{C}$  carrier is initially set to the middle of  $^{13}\text{C}'$  region (174 ppm), and shifted to  $^{13}\text{C}^\alpha$  region (54 ppm) prior to  $90^\circ$   $^{15}\text{N}$  pulse  $\phi_3$ . All band-selective  $90^\circ$  and  $180^\circ$  pulses for  $^{13}\text{C}^\alpha$  (54 ppm) and  $^{13}\text{C}'$  (174 ppm) have the shape of Q5 and Q3 (Emsley and Bodenhausen 1992) and duration of 240.0 ms and 192.0 ms at 800 MHz, respectively. The adiabatic  $180^\circ$  Chirp broadband inversion pulse, denoted with striped half ellipsoid in both  $^{13}\text{C}$  channels, for inverting  $^{13}\text{C}^\alpha$  and  $^{13}\text{C}'$  magnetization in the middle of  $t_2$  period had duration of 500 ms at 800 MHz (Böhlen and Bodenhausen 1993). The Waltz-65 sequence (Zhou et al. 2007) with strength of 4.17 kHz was employed to decouple  $^1\text{H}$  spins. The GARP (Shaka et al. 1985, 1987) with field strength of 4.55 kHz was used to decouple  $^{13}\text{C}$  during acquisition. Delay durations:  $\tau = 1/(4J_{\text{HC}}) \sim 1.7$  ms;  $\tau_2 = 3.4$  ms (optimized for non-glycine residues) or 2.2 - 2.6 ms (for observing both glycine and non-glycine residues);  $2T_{\text{C}} = 1/(2J_{\text{C}^\alpha\text{C}'}) \sim 9.5$  ms;  $2T_{\text{CAN}} \sim 28$  ms. Maximum  $t_3$  is restrained  $t_{3,\text{max}} < 2.0 \cdot (T_{\text{CAN}} - t_2)$ . Frequency discrimination in  $^{13}\text{C}'$ ,  $^{15}\text{N}$  and  $^{13}\text{C}^\alpha$  dimensions is obtained using the States-TPPI protocol (Marion et al. 1989) applied to  $\phi_1$ ,  $\phi_2$ , and  $\phi_3$ , respectively. Phase cycling:  $\phi_1 = x, -x$ ;  $\phi_2 = 2(x), 2(-x)$ ;  $\phi_3 = 4(y), 4(-y)$ ;  $\phi_4 = y$ ; rec. =  $x, 2(-x), x, -x, 2(x), -x$ . Gradient strengths (% of max G/cm) and durations (ms):  $G_1 = 17\%$ , 0.234 ms;  $G_2 = 40\%$ , 1.0 ms;  $G_3 = 60\%$ , 1.0 ms;  $G_4 = 25\%$ , 1.0 ms;  $G_5 = 80\%$ , 1.0 ms;  $G_6 = 35.7\%$ , 0.234 ms.

## References

- Böhlen J-M, Bodenhausen G (1993) Experimental aspects of chirp NMR spectroscopy. *J Magn Reson Ser A* 102:293–301. doi: 10.1006/jmra.1993.1107
- Emsley L, Bodenhausen G (1992) Optimization of shaped selective pulses for NMR using a quaternion description of their overall propagators. *J Magn Reson* 97:135–148. doi: 10.1016/0022-2364(92)90242-Y
- Marion D, Ikura M, Tschudin R, Bax A (1989) Rapid recording of 2D NMR-spectra without phase cycling – application to the study of hydrogen-exchange in proteins. *J Magn Reson* 85:393-399. doi: 10.1016/0022-2364(89)90152-2
- Shaka AJ, Barker PB, Freeman R (1985) Computer-optimized decoupling scheme for wideband applications and low-level operation. *J Magn Reson* 64:547–552. doi: 10.1016/0022-2364(85)90122-2
- Shaka AJ, Keeler J (1987) Broadband spin decoupling in isotropic liquids. *Prog Nucl Magn Reson Spectrosc* 19:47–129. doi: 10.1016/0079-6565(87)80008-0
- Zhou Z, Kümmerle R, Qiu X, Redwine D, Cong R, Taha A, Baugh D, Winniford B (2007) A new decoupling method for accurate quantification of polyethylene copolymer composition and triad sequence distribution with  $^{13}\text{C}$  NMR. *J Magn Reson* 187:225–233. doi: 10.1016/j.jmr.2007.05.005
